# Supplementary material
Source: publisher figshare collection journal article supplement (https://tandf.figshare.com/articles/dataset/_/5510098)
Supplement: Supplementary file 1 [file 1]

# Supplemental Materials

Kris Sankaran

September 23, 2017

## 1 Supplemental Materials

### 1.1 Links

- treelapse home page: <https://krisrs1128.github.io/treelapse/>
- treelapse development page: <https://github.com/krisrs1128/treelapse>
- treelapse video demo: <https://www.youtube.com/watch?v=EcMYBRMVMbI&t=14s>
- Home prices data: <http://www.zillow.com/research/data/>
- Bikesharing data: <https://archive.ics.uci.edu/ml/datasets/Bike+Sharing+Dataset>
